# Supplementary material for: The construction of a novel luminescent lanthanide framework for the selective sensing of Cu2+ and 4-nitrophenol in water
Source: Royal Society of Chemistry journal article supplement (doi:10.1039/d0dt04089d), 2020-12-31
Supplement: d0dt04089d1.pdf [file d0dt04089d1.pdf]

## Supporting Information

# Construction of Novel Luminescent Lanthanide Framework for Selective Sensing of Cu<sup>2+</sup> and 4-Nitrophenol in water

Zeng-Gang Lin,<sup>a</sup> Fu-Qiang, Song,<sup>a</sup> Hui, Wang,<sup>a</sup> Xue-Qin, Song,<sup>a\*</sup> Xin-Xin, Yu,<sup>a</sup> and Wei-sheng Liu<sup>b</sup>

a) School of Chemical and Biological Engineering, Lanzhou Jiaotong University, Lanzhou 730070, China

b) College of Chemistry and Chemical Engineering and State Key Laboratory of Applied Organic Chemistry, Lanzhou University, Lanzhou 730000, China

### Contents

|                                                                                                                                                                                                                             |       |
|-----------------------------------------------------------------------------------------------------------------------------------------------------------------------------------------------------------------------------|-------|
| Materials and Physical Measurements -----                                                                                                                                                                                   | S3    |
| Details of Single Crystal X-ray Diffraction -----                                                                                                                                                                           | S3~S4 |
| <b>Table S1</b> Crystal data and structure refinement parameters for <b>LZG-Eu</b> and <b>LZG-Tb</b> -----                                                                                                                  | S5    |
| <b>Table S2</b> Shape calculation results of <b>LZG-Eu</b> and <b>LZG-Tb</b> -----                                                                                                                                          | S5    |
| <b>Table S3</b> Important bond lengths and angles for <b>LZG-Eu</b> and <b>LZG-Tb</b> -----                                                                                                                                 | S6    |
| <b>Fig. S1</b> IR spectra of <b>H<sub>4</sub>L</b> , <b>LZG-Eu</b> and <b>LZG-Tb</b> -----                                                                                                                                  | S7    |
| <b>Fig. S2</b> TGA curves of <b>LZG-Eu</b> and <b>LZG-Tb</b> under N <sub>2</sub> atmosphere from 30 to 800 °C.-----<br>-----                                                                                               | S7    |
| <b>Fig. S3</b> Powder X-ray diffraction patterns (PXRD) of <b>LZG-Eu</b> and <b>LZG-Tb</b> and that of simulated from single crystal analysis.-----                                                                         | S7    |
| <b>Fig. S4</b> PXRD patterns of <b>LZG-Eu</b> after treated by aqueous solutions with various pH values from 3 to 12, after storage in water for 14 days, after frozen at -20°C and heated at 50°C in water for 1 day.----- | S8    |
| <b>Fig. S5</b> PXRD patterns of <b>LZG-Tb</b> after treated by aqueous solutions with various pH values from 3 to 12, after storage in water for 14 days, after frozen at -20°C and heated at 50°C in water for 1 day.----- | S8    |
| <b>Fig. S6</b> The relative emission intensity of <b>LZG-Eu</b> (a) and <b>LZG-Tb</b> (b) in aqueous solutions with different pH values (3-12) and different temperatures.-----                                             | S9    |
| <b>Fig. S7</b> The projection structure and topology of <b>LZG-Tb</b> -----                                                                                                                                                 | S9    |

**Fig. S8** The N<sub>2</sub> adsorption isotherms of **LZG-Tb** at 195 K -----S9

**Fig. S9** Excitation and emission spectra of **H<sub>4</sub>L**-----S10

**Fig. S10** The luminescence decay lifetimes of the **LZG-Eu(a)** and **LZG-Tb(b)** -----S10

**Fig. S11** The competition experiments of **LZG-Eu (a)** and **LZG-Tb (b)** for the detection of Cu<sup>2+</sup> ion in the presence of the interference metal cations-----S10

**Fig. S12** The competition experiments of **LZG-Eu (a)** and **LZG-Tb (b)** for the detection of 4-NP in the presence of the interference nitro explosives-----S11

**Fig. S13** PXRD patterns of **LZG-Eu, LZG-Tb** after storage in 4-NP and Cu<sup>2+</sup> aqueous solutions.-  
-----S11

**Fig. S14** a) The decay curves of **LZG-Eu** water suspension under different concentrations of 4-NP; b) Excitation spectra of **LZG-Eu** water suspensions under different concentrations of 4-NP; c) Excitation spectra of **LZG-Tb** water suspensions under different concentrations of 4-NP-----S11

**Fig. S15** a) The luminescence response of **LZG-Eu** to different concentrations of Cu<sup>2+</sup>(0~0.60μM) in river water. b) The relationship between the I<sub>0</sub>/I Stern-Volmer diagram of **LZG-Eu** and the increase of Cu<sup>2+</sup> concentration in river water. c) The luminescence response of **LZG-Tb** to different concentrations of Cu<sup>2+</sup>(0~1.0μM) in river water. d) The relationship between the I<sub>0</sub>/I Stern-Volmer diagram of **LZG-Tb** and the increase of Cu<sup>2+</sup> concentration in river water.-----  
-----S12

**Fig. S16** a) The luminescence response of **LZG-Eu** to different concentrations of 4-NP(0~7.5 μM) in river water. b) The relationship between the I<sub>0</sub>/I Stern-Volmer diagram of **LZG-Eu** and the increase of 4-NP concentration in river water. c) The luminescence response of **LZG-Tb** to different concentrations of 4-NP(0~7.5μM) in river water. d) The relationship between the I<sub>0</sub>/I Stern-Volmer diagram of **LZG-Tb** and the increase of 4-NP concentration in river water.-----  
----- S13

**Fig. S17** a) The luminescence response of **LZG-Eu** to different concentrations of Cu<sup>2+</sup>(0-0.65μM) in tap water; b) The relationship between the I<sub>0</sub>/I Stern-Volmer diagram of **LZG-Eu** and the increase of Cu<sup>2+</sup> concentration in tap water; c) The luminescence response of **LZG-Tb** to different concentrations of Cu<sup>2+</sup>(0-1.0μM) in tap water; d) The relationship between the I<sub>0</sub>/I Stern-Volmer diagram of **LZG-Tb** and the increase of Cu<sup>2+</sup> concentration in tap water.-----  
-----S14

**Fig. S18** a) The luminescence response of **LZG-Eu** to different concentrations of 4-NP(0-7.5μM) in tap water; b) The relationship between the I<sub>0</sub>/I Stern-Volmer diagram of **LZG-Eu** and the increase of 4-NP concentration in tap water; c) The luminescence response of **LZG-Tb** to different concentrations of 4-NP(0-7.5μM) in tap water; d) The relationship between the I<sub>0</sub>/I Stern-Volmer diagram of **LZG-Tb** and the increase of 4-NP concentration in tap water.-----  
-----S15

**References**-----

## Materials and Physical Measurements

All the reagents and  $\text{Ln}(\text{NO}_3)_3 \cdot 6\text{H}_2\text{O}$  used were purchased from Aladdin Reagent (Shanghai) Co., Ltd. without further purification.

The relevant data of the elemental analysis described in this article was obtained through the Thermo Flash 2000 elemental analyzer. The infrared spectrum were measured on a Thermo Mattson FTIR spectrometer, and the wavenumber range was  $4000\sim 400\text{ cm}^{-1}$ . The powder X-ray diffraction (PXRD) patterns were determined on an X-ray diffractometer (Rigaku D/Max 2200PC) in the  $2\theta$  range of  $5^\circ\sim 50^\circ$ . The thermal analysis is performed from  $30^\circ\text{C}$  to  $800^\circ\text{C}$  at a heating rate of  $10^\circ\text{C min}^{-1}$  under  $\text{N}_2$  atmosphere on a TGA/NETZSCH STA449C instrument. Nitrogen ( $\text{N}_2$ ) gas sorption measurement was performed on a ASAP2020M&TriStar 3020 surface area analyzer (Micromeritics Instruments Corp., U.S.) at 195 K. The X-ray photoelectron spectroscopy (XPS) measurements were performed on Kratos AXIS Ultra DLD spectrometer. Mercury program version 3.10 were used to simulate the PXRD mode of rare earth complexes. F-7000 fluorescence spectrophotometer was used to obtain the luminescence of the solid powder and the suspension, and the wavelength range was  $200\sim 800\text{ nm}$ . The luminescence lifetime and quantum yield were recorded on the FLS920 luminescence spectrometer in Edinburgh instrument. The decay curves were fitted by a mono-exponential function:  $I = I_0 + A\exp(-t/\tau)$ , where  $I$  and  $I_0$  are the luminescent intensities at time  $t = t$  and  $t = 0$ , respectively, and  $\tau$  is defined as the luminescent lifetime. The luminescence quantum yields of the solid samples were determined by the absolute method using the integrating sphere on FLS920 (diameter 150 mm,  $\text{BaSO}_4$  coating) of Edinburgh Instrument.

## Crystallographic Data Collection and Refinement.

Single crystals of **LZG-Eu** and **LZG-Tb** with approximate dimensions of  $0.18 \times 0.12 \times 0.10\text{ mm}^3$  and  $0.20 \times 0.16 \times 0.14\text{ mm}^3$  which were suitable for X-ray diffraction were obtained in moderate yield by solvothermal method. Crystal data of **LZG-Eu** was collected on a Bruker APEX-II CCD diffractometer ( $\text{MoK}\alpha$  radiation,  $\lambda = 0.71073\text{ \AA}$ ) at 100 K and that for **LZG-Tb** was collected on a Bruker SuperNova diffractometer ( $\text{CuK}\alpha$  radiation,  $\lambda = 1.54184\text{ \AA}$ ) at 293 K. Structures were solved by direct methods and refined by a full matrix least-squares technique based on  $F^2$  using the SHELXL 2014 program.<sup>1</sup> All of the non-hydrogen atoms were refined anisotropically. The organic hydrogen atoms were generated geometrically. Disordered phenylic H and uncoordinated carboxyl H for **LZG-Eu** and uncoordinated carboxyl H for **LZG-Tb** were

not located but are included in their formulas. In addition, the disordered crystalline water and DMF molecules in **LZG-Eu** and **LZG-Tb** are difficult to identify, correspondingly, solvate molecules were accounted for by using the program PLATON/SQUEEZE (Spek, 2009) in order to remove the contributions of disordered solvent.<sup>2</sup> For details about the squeezed material, see cif data in Supporting Information. Therefore, free water and DMF molecules which were determined on the basis of TGA and elemental microanalysis, and the data treated with the SQUEEZE routine within PLATON were added to the molecular formula of **LZG-Eu** and **LZG-Tb** respectively. Drawings of the molecules were performed with the program Diamond.<sup>3</sup> Crystallographic data as well as details of data collection and refinement for these complexes are summarized in Table S1, important bond lengths are listed in Table S3. CCDC 2034442 and 2034444 contain the supplementary crystallographic data of **LZG-Eu** and **LZG-Tb**, which can be obtained from the authors or the Cambridge Crystallographic Data Centre via [www.ccdc.cam.ac.uk/data\\_request/cif](http://www.ccdc.cam.ac.uk/data_request/cif).

**Table S1.** Crystal data and structure refinement parameters for **LZG-Eu** and **LZG-Tb**.

|                                                                             |                                                                                                       |                                                                                                        |
|-----------------------------------------------------------------------------|-------------------------------------------------------------------------------------------------------|--------------------------------------------------------------------------------------------------------|
| CCDC No                                                                     | 2034442                                                                                               | 2034444                                                                                                |
| Empirical formula                                                           | C <sub>20</sub> H <sub>8</sub> N <sub>2</sub> O <sub>8</sub> Eu                                       | C <sub>20</sub> H <sub>8</sub> N <sub>2</sub> O <sub>8</sub> Tb                                        |
| Temperature (K)                                                             | 100(2)                                                                                                | 293(2)                                                                                                 |
| formula_weight                                                              | 555.24                                                                                                | 563.20                                                                                                 |
| Diffraction                                                                 | Mo K $\alpha$ (0.71073 Å)                                                                             | CuK $\alpha$ (1.54184 Å)                                                                               |
| Crystal system, Space group                                                 | Trigonal, P $\bar{3}$ c1                                                                              | Trigonal, P $\bar{3}$ c1                                                                               |
| Unit cell dimensions                                                        | a = 30.8375(8)Å; $\alpha$ = 90°<br>b = 30.8375(8)Å; $\beta$ = 90°<br>c = 12.9766(5)Å; $\gamma$ = 120° | a = 30.5392(7)Å; $\alpha$ = 90°<br>b = 30.5392(7)Å; $\beta$ = 90°<br>c = 13.0003(4) Å; $\gamma$ = 120° |
| V/Å <sup>3</sup> , Z                                                        | 10686.8(7), 12                                                                                        | 10500.3(6), 12                                                                                         |
| D <sub>calcd</sub> /Mg m <sup>-3</sup>                                      | 1.035                                                                                                 | 1.069                                                                                                  |
| $\mu$ /mm <sup>-1</sup>                                                     | 1.789                                                                                                 | 10.203                                                                                                 |
| F(000)                                                                      | 3204                                                                                                  | 3252                                                                                                   |
| $\Theta$ range for data collection                                          | 2.228°~27.534°                                                                                        | 4.423° ~70.344°                                                                                        |
| index ranges, <i>hkl</i>                                                    | -39 ≤ <i>h</i> ≤ 40<br>-40 ≤ <i>k</i> ≤ 33<br>-16 ≤ <i>l</i> ≤ 16                                     | -26 ≤ <i>h</i> ≤ 36<br>-36 ≤ <i>k</i> ≤ 26<br>-15 ≤ <i>l</i> ≤ 13                                      |
| Independent reflections ( <i>R</i> <sub>int</sub> )                         | 0.0522                                                                                                | 0.0515                                                                                                 |
| Completeness                                                                | 100 %                                                                                                 | 97.7%                                                                                                  |
| Reflections unique / collected                                              | 8222 / 151590                                                                                         | 6545 / 24811                                                                                           |
| Data / restraints / params                                                  | 8222 / 70 / 298                                                                                       | 6545 / 200 / 306                                                                                       |
| Goodness-of-fit on <i>F</i> <sup>2</sup>                                    | 1.042                                                                                                 | 1.044                                                                                                  |
| Final <i>R</i> indices [ <i>I</i> > 2 $\sigma$ ( <i>I</i> )] <sup>a,b</sup> | <i>R</i> <sub>1</sub> = 0.0675, <i>wR</i> <sub>2</sub> = 0.1872                                       | <i>R</i> <sub>1</sub> = 0.0450, <i>wR</i> <sub>2</sub> = 0.1160                                        |
| <i>R</i> indices (all data) <sup>a,b</sup>                                  | <i>R</i> <sub>1</sub> = 0.0685, <i>wR</i> <sub>2</sub> = 0.1879                                       | <i>R</i> <sub>1</sub> = 0.0586, <i>wR</i> <sub>2</sub> = 0.1234                                        |

$$^a R_1 = \frac{\sum ||F_o| - |F_c||}{\sum |F_o|} \quad ^b wR_2 = \left\{ \frac{\sum [w(F_o^2 - F_c^2)^2]}{\sum [w(F_o^2)^2]} \right\}^{1/2}$$

S H A P E v2.1 Continuous Shape Measures calculation

(c) 2013 Electronic Structure Group, Universitat de Barcelona

Contact: llunell@ub.edu

**Table S2.** Shape calculation results of Ln<sup>III</sup> in **LZG-Eu** and **LZG-Tb**

|                                                      | <b>LZG-Eu</b>  | <b>LZG-Tb</b>  |
|------------------------------------------------------|----------------|----------------|
| Octagon(OP-8)                                        | 0.27179        | 0.23509        |
| Heptagonal pyramid(HPY-8)                            | 0.17760        | 0.17438        |
| Hexagonal bipyramid(HBPY-8)                          | 0.19547        | 0.19737        |
| Cube(CU-8)                                           | 0.21151        | 0.21179        |
| Square antiprism(SAPR-8)                             | 0.16282        | 0.16263        |
| Triangular dodecahedron(TDD-8)                       | <u>0.15185</u> | 0.14865        |
| Johnson gyrobifastigium J26(JGBF-8)                  | 0.20258        | 0.19825        |
| Johnson elongated triangular bipyramid J14(JETBPY-8) | 0.21950        | 0.21408        |
| Biaugmented trigonal prism J50 (JBTPR-8)             | 0.16962        | 0.15230        |
| Biaugmented trigonal prism (BTPR-8)                  | 0.15528        | <u>0.14721</u> |
| Snub diphenoid J84(JSD-8)                            | 0.18026        | 0.17145        |
| Triakis tetrahedron(TT-8)                            | 0.21345        | 0.21379        |
| Elongated trigonal bipyramid(ETBPY-8)                | 0.27311        | 0.26712        |

**Table S3.** Selected bond lengths (Å ) and angles (°) for **LZG-Eu** and **LZG-Tb**.

| <b>{[Eu(HL)·3DMF·3H<sub>2</sub>O]<sub>n</sub> (LZG-Eu)}</b>  |            |           |           |           |            |           |            |        |          |
|--------------------------------------------------------------|------------|-----------|-----------|-----------|------------|-----------|------------|--------|----------|
| Eu1–O1                                                       | 2.298(6)   | Eu1–O2    | 2.416(5)  | Eu1–O4    | 2.423(6)   | Eu1–O5    | 2.308(6)   | Eu1–O6 | 2.453(5) |
| Eu1–O7                                                       | 2.431(6)   | Eu1–N1    | 2.494(6)  | Eu1–N2    | 2.520(6)   |           |            |        |          |
| O1–Eu1–O4                                                    | 79.8(2)    | O1–Eu1–O5 | 121.0(3)  | O1–Eu1–O6 | 81.7(2)    | O1–Eu1–N1 | 138.4(3)   |        |          |
| O1–Eu1–N2                                                    | 75.0(2)    | O1–Eu1–O2 | 147.3(2)  | O1–Eu1–O7 | 84.3(3)    | O2–Eu1–O4 | 128.1(2)   |        |          |
| O2–Eu1–O6                                                    | 1.40(18)   | O2–Eu1–O7 | 84.22(19) | O2–Eu1–N1 | 64.6(2)    | O2–Eu1–N2 | 72.4(2)    |        |          |
| O4–Eu1–O6                                                    | 143.7(2)   | N1–Eu1–N2 | 120.2(2)  | O7–Eu1–N2 | 64.4(2)    | O7–Eu1–N1 | 71.6(2)    |        |          |
| O7–Eu1–O6                                                    | 127.82(18) | O6–Eu1–N2 | 63.40(17) | O6–Eu1–N1 | 139.75(18) | O5–Eu1–N2 | 135.4(2)   |        |          |
| O5–Eu1–N1                                                    | 72.2(2)    | O5–Eu1–O7 | 148.8(2)  | O5–Eu1–O6 | 77.33(19)  | O5–Eu1–O4 | 85.9(3)    |        |          |
| O5–Eu1–O2                                                    | 81.9(2)    | O4–Eu1–N2 | 138.6(2)  | O4–Eu1–N1 | 63.6(2)    | O4–Eu1–O7 | 81.0(3)    |        |          |
| <b>{ [Tb(HL)·3DMF·3H<sub>2</sub>O]<sub>n</sub> (LZG-Tb)}</b> |            |           |           |           |            |           |            |        |          |
| Tb1–O2                                                       | 2.379(4)   | Tb1–O3    | 2.443(3)  | Tb1–O4    | 2.275(4)   | Tb1–O5    | 2.387(3)   | Tb1–O6 | 2.268(4) |
| Tb1–O7                                                       | 2.382(4)   | Tb1–N1    | 2.489(4)  | Tb1–N2    | 2.483(4)   |           |            |        |          |
| O7–Tb1–N2                                                    | 63.80(13)  | O7–Tb1–N1 | 139.41(5) | O7–Tb1–O5 | 128.52(12) | O7–Tb1–O3 | 141.92(13) |        |          |
| O6–Tb1–N2                                                    | 139.88(15) | O6–Tb1–N1 | 76.68(15) | O6–Tb1–O7 | 79.67(5)   | O6–Tb1–O5 | 148.38(14) |        |          |
| O6–Tb1–O4                                                    | 114.57(18) | O6–Tb1–O3 | 79.75(14) | O6–Tb1–O2 | 86.90(15)  | N1–Tb1–N2 | 120.97(3)  |        |          |
| O5–Tb1–N2                                                    | 64.73(12)  | O5–Tb1–N1 | 72.08(13) | O5–Tb1–O3 | 82.35(12)  | O4–Tb1–N2 | 79.06(15)  |        |          |
| O4–Tb1–N1                                                    | 135.92(5)  | O4–Tb1–O7 | 84.06(16) | O4–Tb1–O5 | 85.68(17)  | O4–Tb1–O3 | 75.94(13)  |        |          |
| O4–Tb1–O2                                                    | 151.73(15) | O3–Tb1–N2 | 139.80(2) | O3–Tb1–N1 | 63.97(12)  | O2–Tb1–N2 | 72.73(13)  |        |          |
| O2–Tb1–N1                                                    | 64.36(13)  | O2–Tb1–O7 | 81.97(14) | O2–Tb1–O5 | 84.01(13)  | O2–Tb1–O3 | 128.29(12) |        |          |

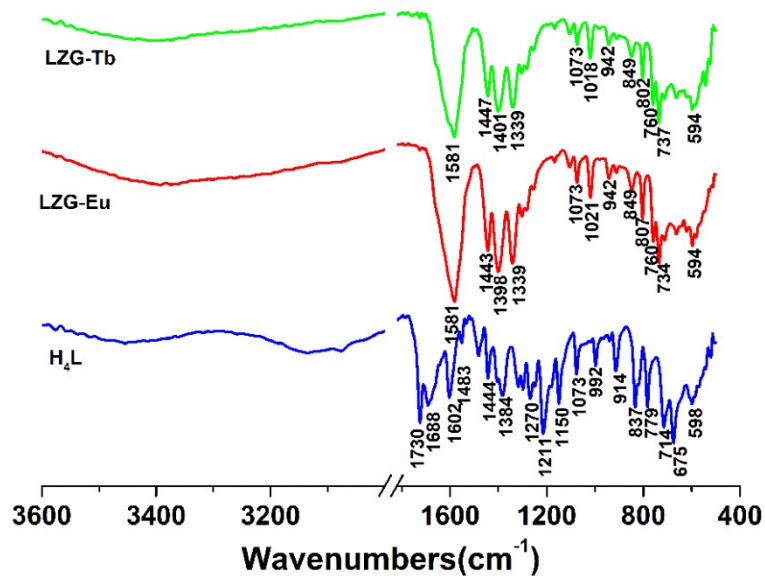

Fig. S1 IR spectra of  $\text{H}_4\text{L}$ , LZG-Eu and LZG-Tb in solid state.

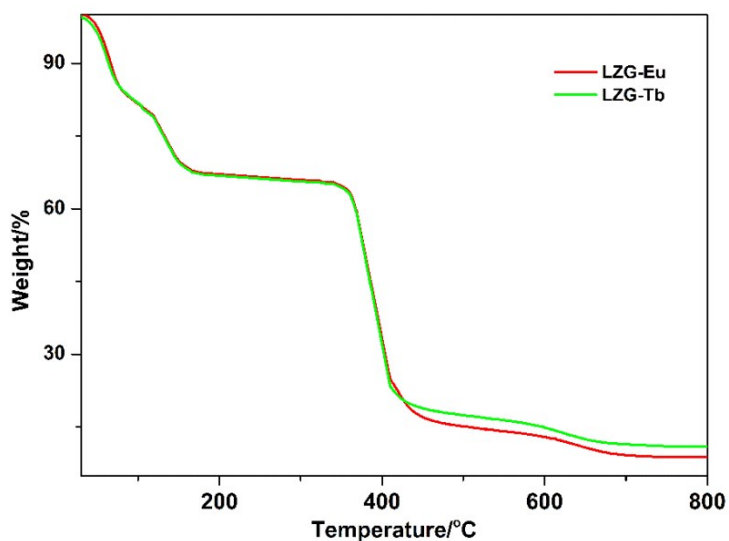

Fig. S2 TGA curves of LZG-Eu and LZG-Tb under  $\text{N}_2$  atmosphere from 30 to 800  $^{\circ}\text{C}$ .

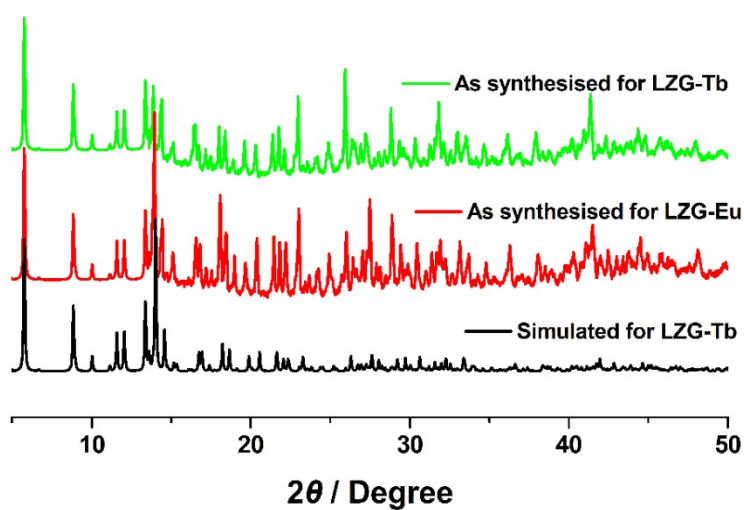

Fig. S3 Powder X-ray diffraction patterns (PXRD) of LZG-Eu and LZG-Tb and that of simulated from single crystal analysis.

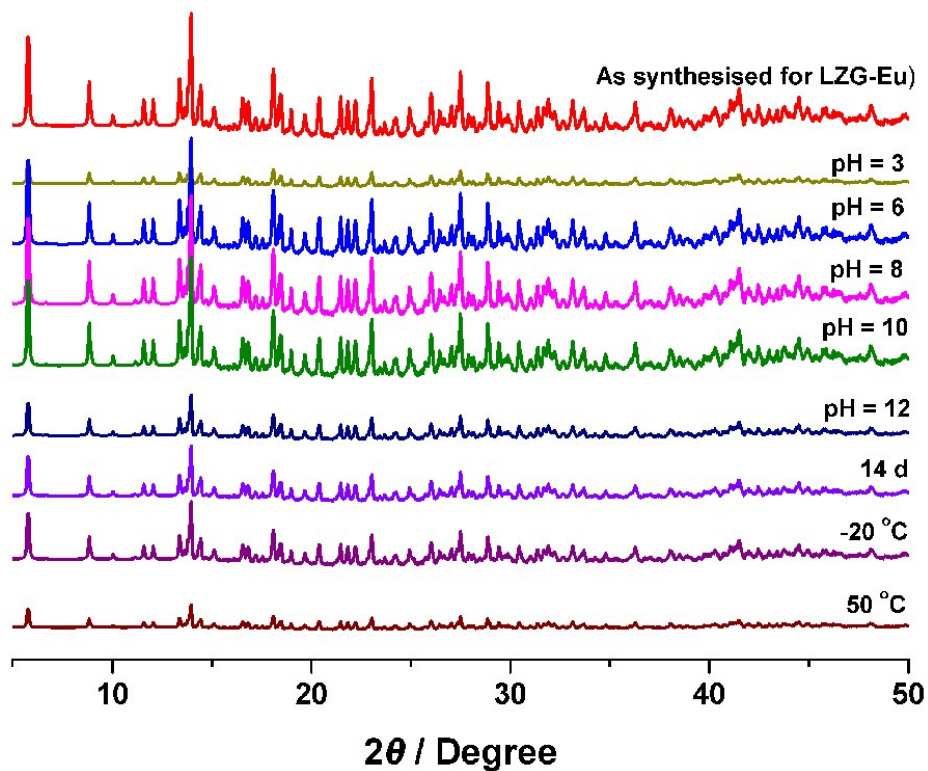

**Fig. S4** PXR D patterns of **LZG-Eu** after treated by aqueous solutions with various pH values from 3 to 12, after storage in water for 14 days, after frozen at -20°C and heated at 50°C in water for 1 day.

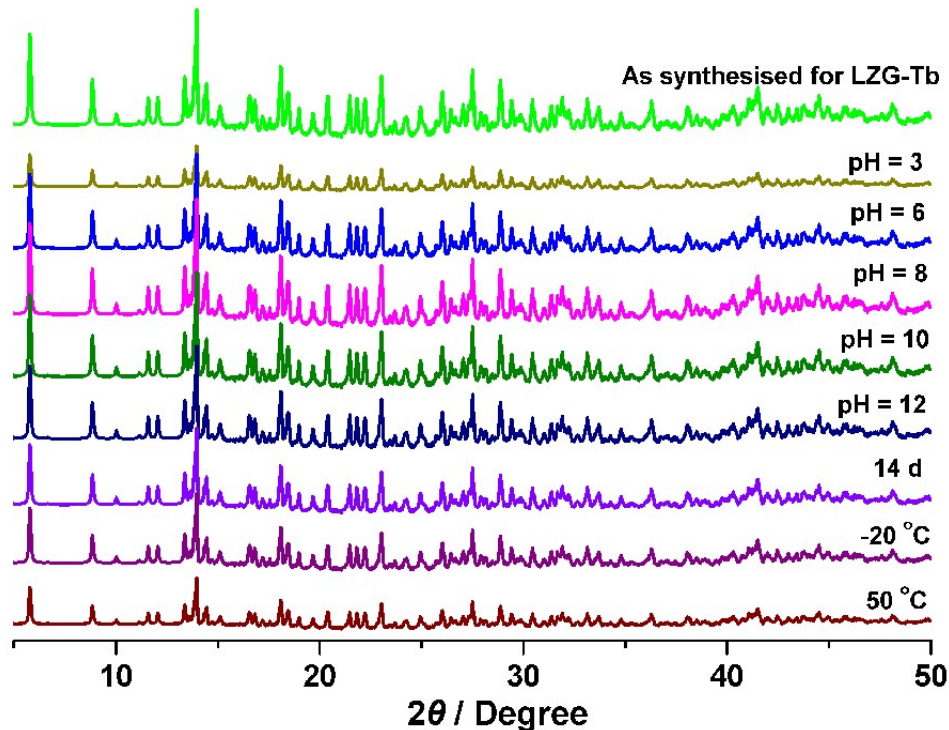

**Fig. S5** PXR D patterns of **LZG-Tb** after treated by aqueous solutions with various pH values from 3 to 12, after storage in water for 14 days, after frozen at -20°C and heated at 50°C in water for 1 day.



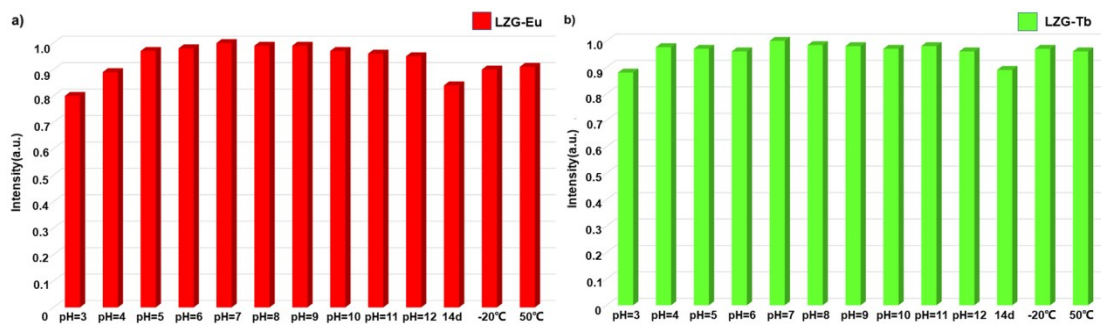

**Fig. S6** The relative emission intensity of LZG-Eu at 614 nm (a) and LZG-Tb in 546 nm (b) in aqueous solutions with different pH values (3-12) and different temperatures.

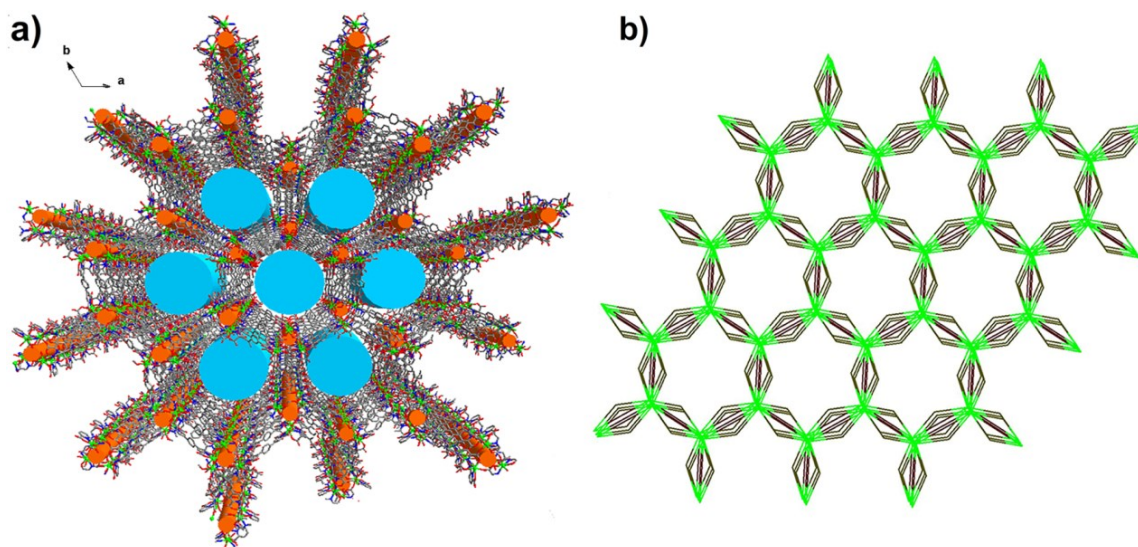

**Fig. S7** The projection structure (a) and topology (b) of LZG-Tb.

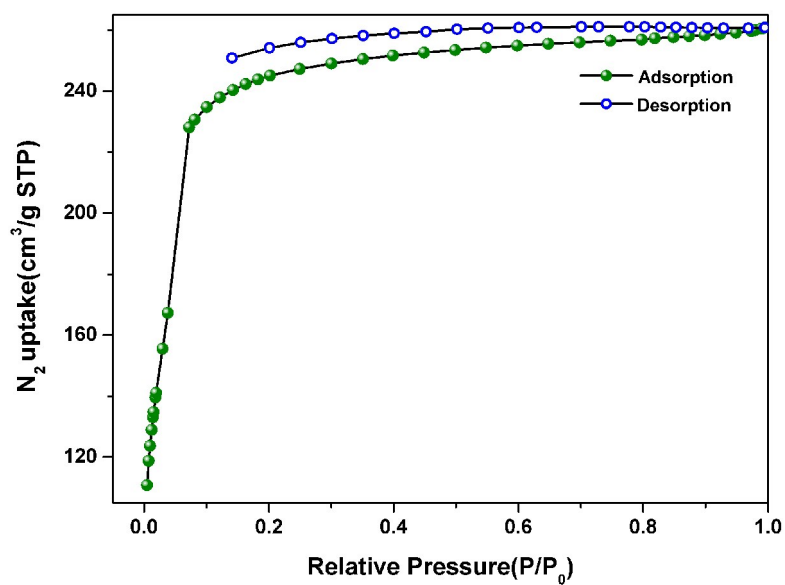

**Fig. S8** The  $N_2$  adsorption isotherms of LZG-Tb at 195 K.

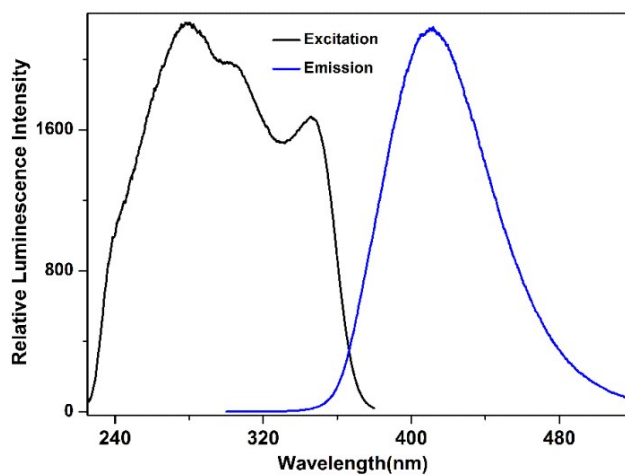

Fig. S9 Excitation and emission spectra of  $H_4L$ .

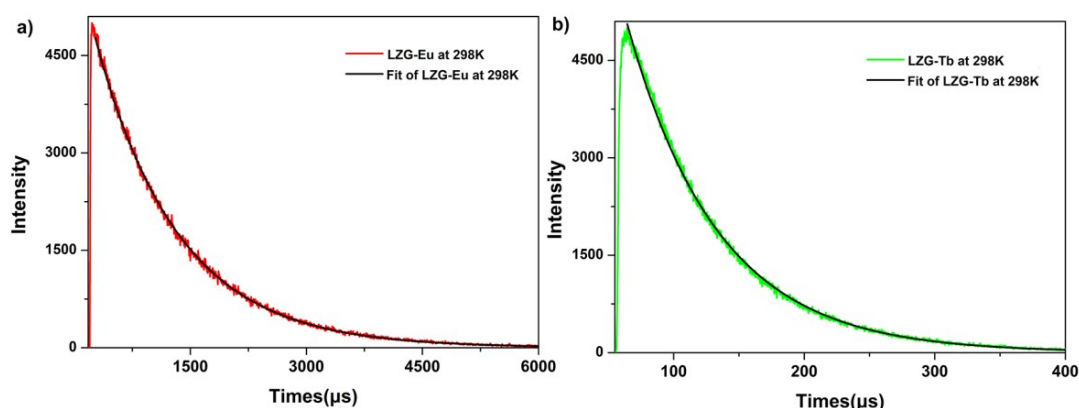

Fig. S10 The luminescence decay lifetimes of the LZG-Eu(a) and LZG-Tb(b).

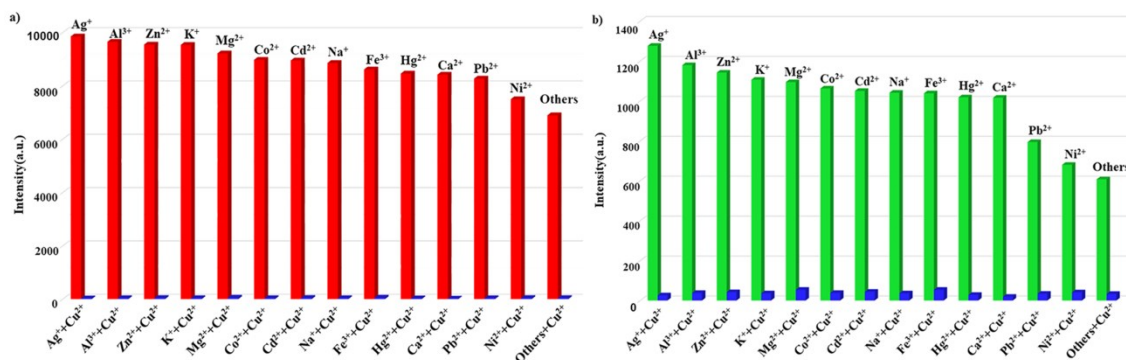

Fig. S11 The competition experiments of LZG-Eu (a) and LZG-Tb (b) for detection of  $Cu^{2+}$  ion in the presence of the interference metal cations.

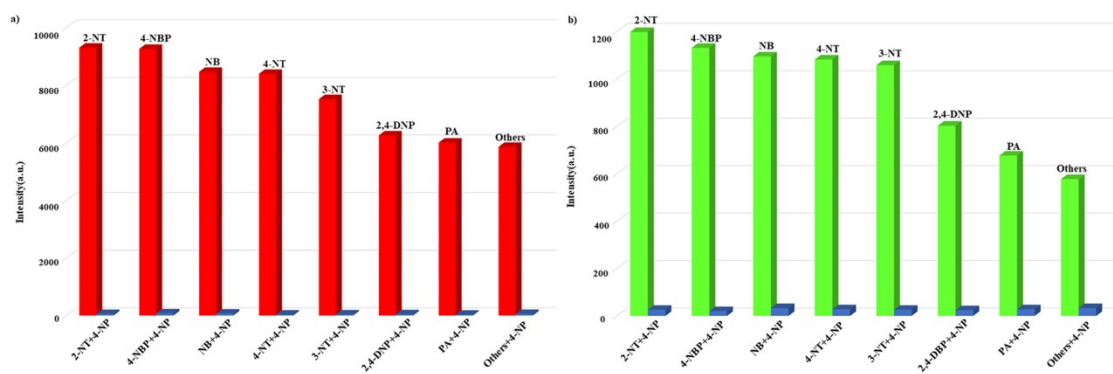

**Fig. S12** The competition experiments of LZG-Eu (a) and LZG-Tb (b) for the detection of 4-NP in the presence of the interference nitro explosives.

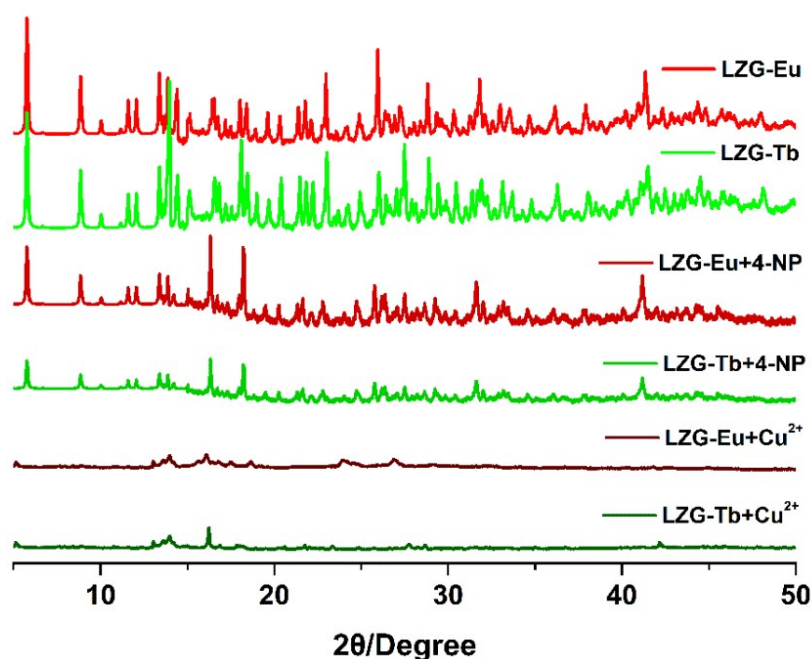

**Fig. S13** PXRD patterns of LZG-Eu, LZG-Tb after immersed in 4-NP and Cu<sup>2+</sup> aqueous solutions.

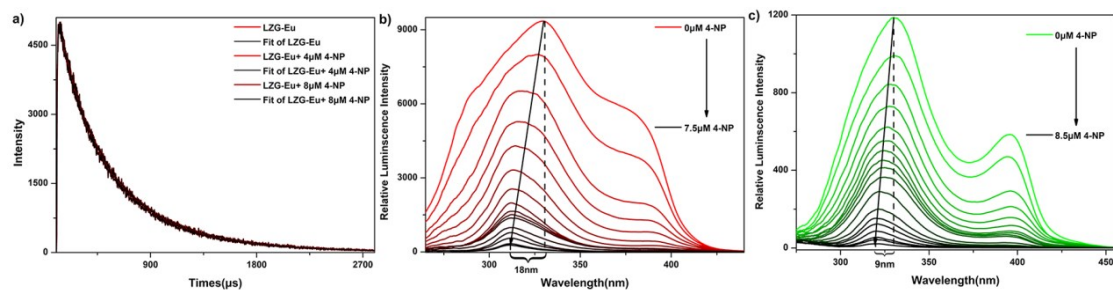

**Fig. S14** a) The decay curves of LZG-Eu water suspension under different concentrations of 4-NP; b) Excitation spectra of LZG-Eu water suspensions under different concentrations of 4-NP; c) Excitation spectra of LZG-Tb water suspensions under different concentrations of 4-NP.

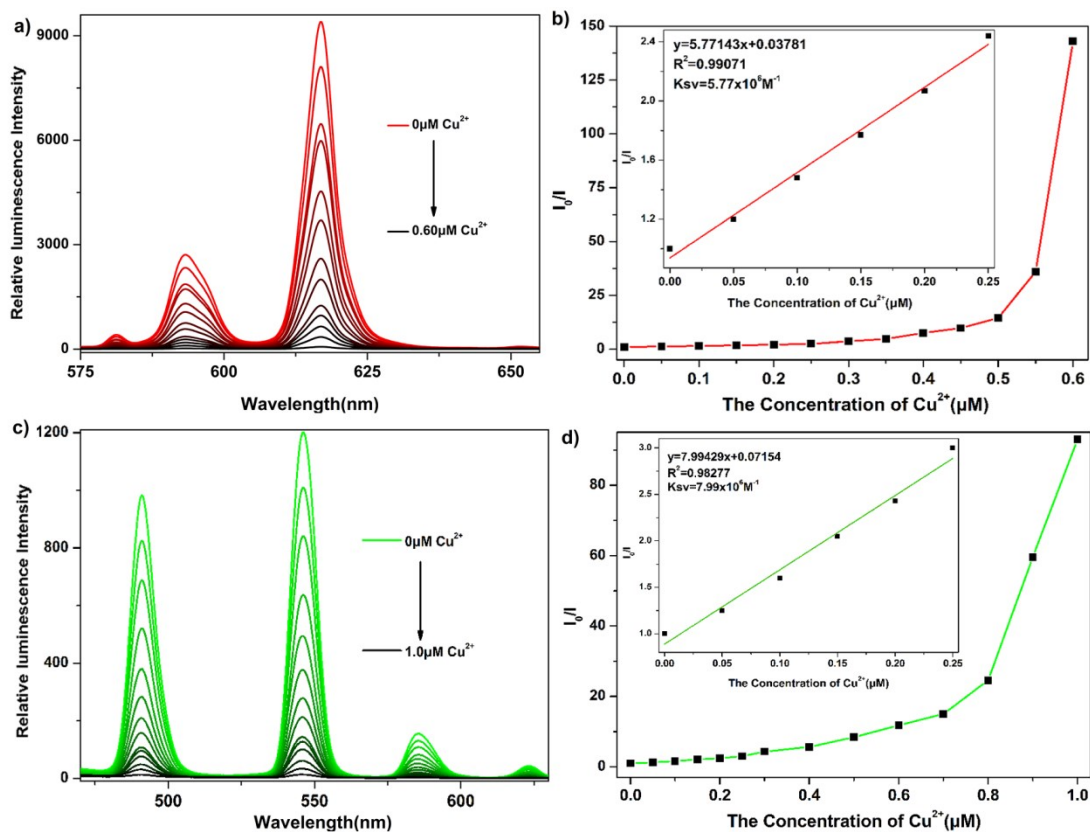

**Fig. S15** a) The luminescence response of **LZG-Eu** to different concentrations of Cu<sup>2+</sup>(0-0.60μM) in river water. b) The relationship between the  $I_0 / I$  Stern-Volmer diagram of **LZG-Eu** and the increase of Cu<sup>2+</sup> concentration in river water. c) The luminescence response of **LZG-Tb** to different concentrations of Cu<sup>2+</sup>(0-1.0μM) in river water. d) The relationship between the  $I_0 / I$  Stern-Volmer diagram of **LZG-Tb** and the increase of Cu<sup>2+</sup> concentration in river water.

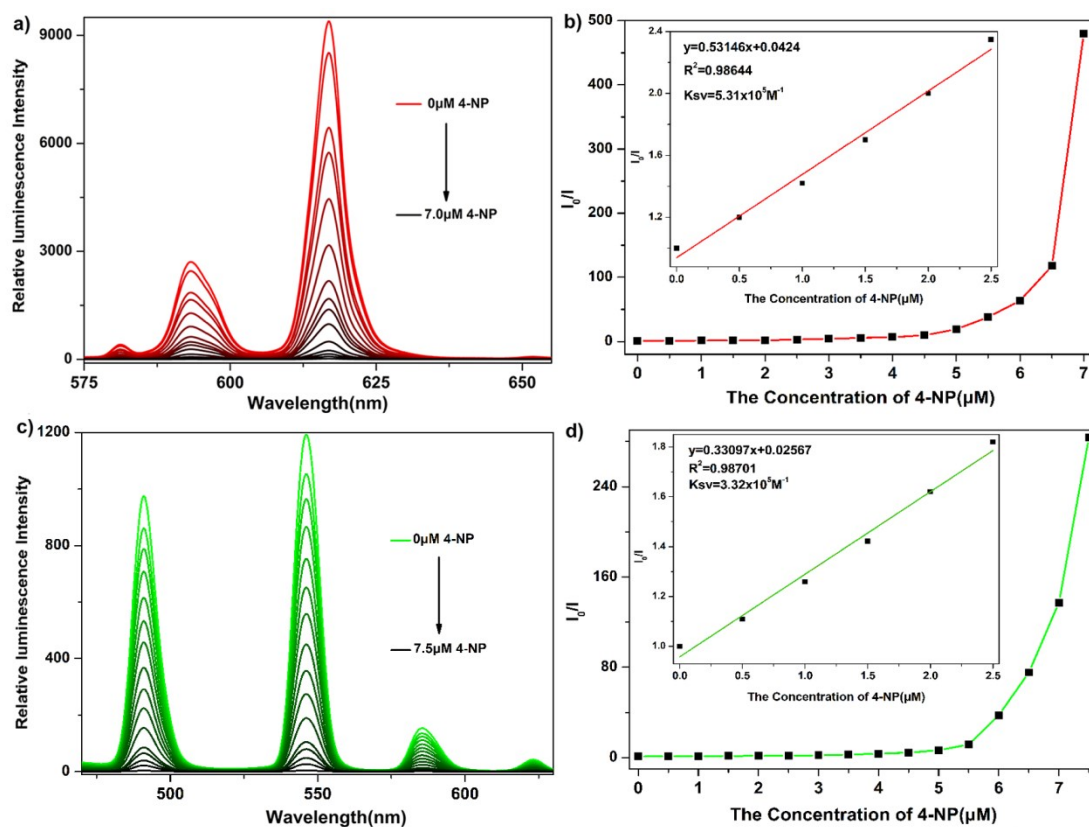

**Fig. S16** a) The luminescence response of **LZG-Eu** to different concentrations of 4-NP(0~7.5 $\mu\text{M}$ ) in river water. b) The relationship between the  $I_0/I$  Stern-Volmer diagram of **LZG-Eu** and the increase of 4-NP concentration in river water. c) The luminescence response of **LZG-Tb** to different concentrations of 4-NP(0~7.5 $\mu\text{M}$ ) in river water. d) The relationship between the  $I_0/I$  Stern-Volmer diagram of **LZG-Tb** and the increase of 4-NP concentration in river water.

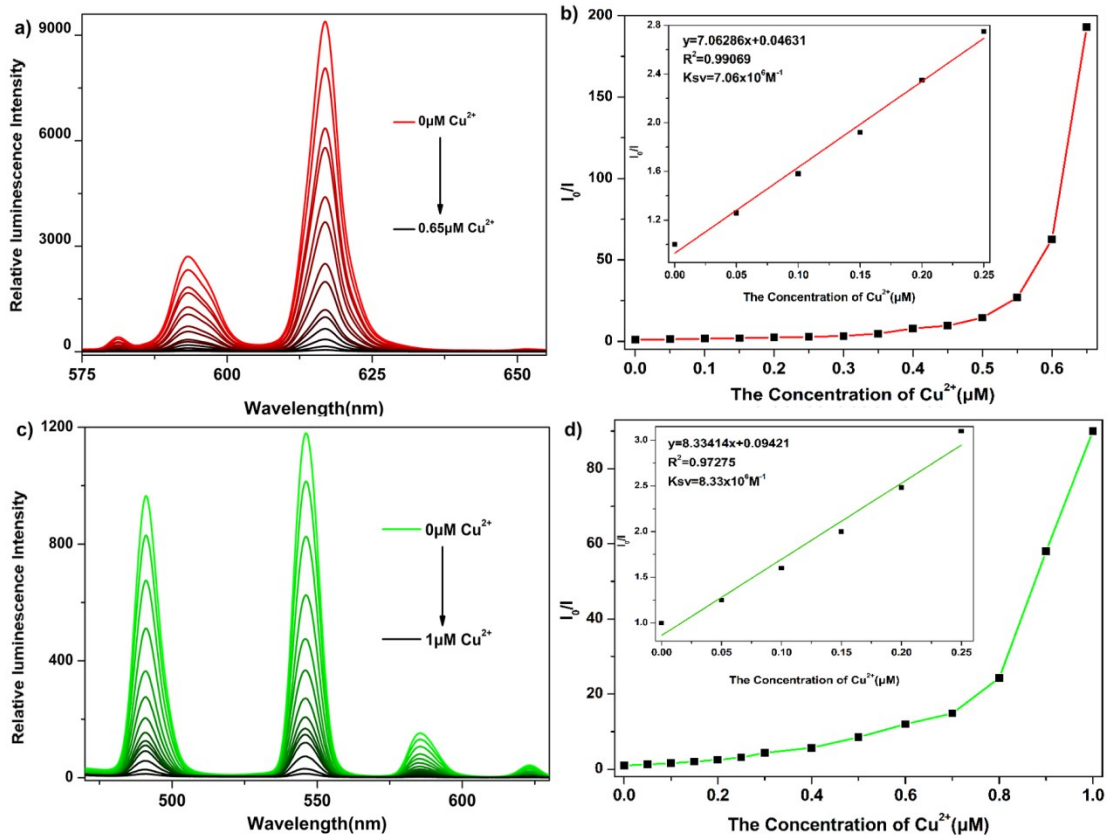

**Fig. S17** a) The luminescence response of **LZG-Eu** to different concentrations of Cu<sup>2+</sup> (0~0.65 μM) in tap water. b) The relationship between the I<sub>0</sub>/I Stern-Volmer diagram of **LZG-Eu** and the increase of Cu<sup>2+</sup> concentration in tap water. c) The luminescence response of **LZG-Tb** to different concentrations of Cu<sup>2+</sup> (0~1.0 μM) in tap water. d) The relationship between the I<sub>0</sub>/I Stern-Volmer diagram of **LZG-Tb** and the increase of Cu<sup>2+</sup> concentration in tap water.

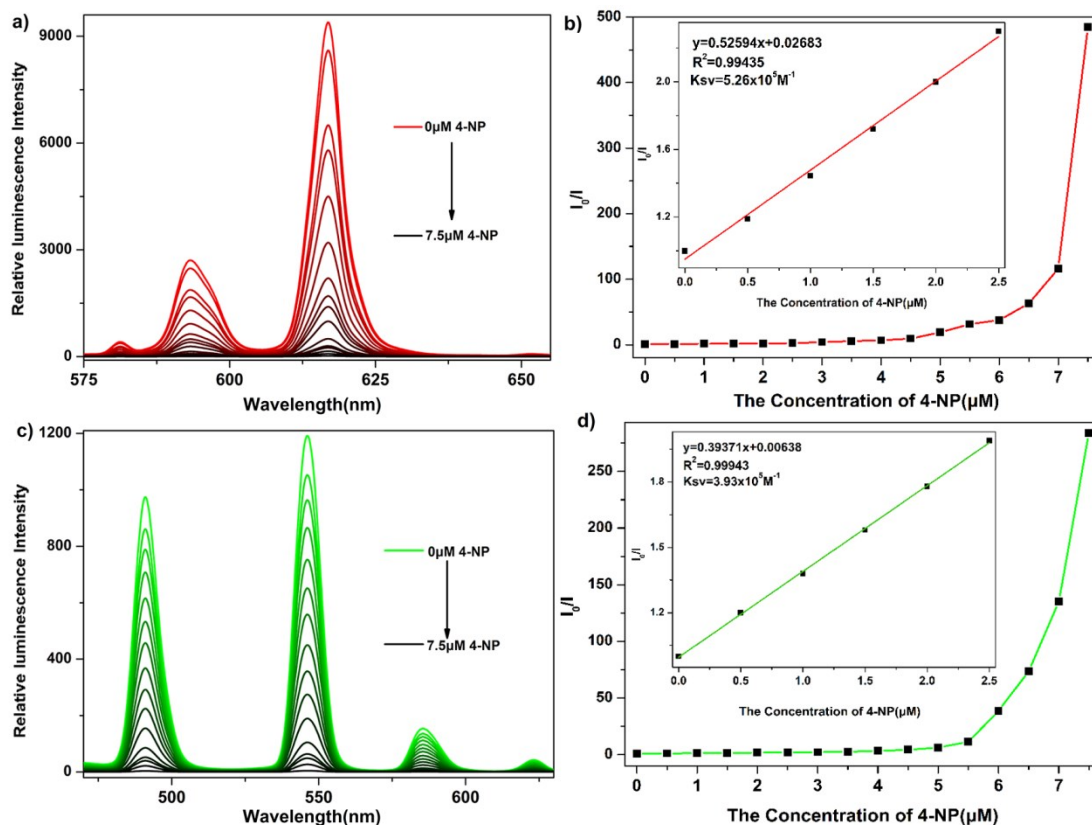

**Fig. S18** a) The luminescence response of **LZG-Eu** to different concentrations of 4-NP(0~7.5μM) in tap water. b) The relationship between the  $I_0/I$  Stern-Volmer diagram of **LZG-Eu** and the increase of 4-NP concentration in tap water. c) The luminescence response of **LZG-Tb** to different concentrations of 4-NP(0~7.5μM) in tap water. d) The relationship between the  $I_0/I$  Stern-Volmer diagram of **LZG-Tb** and the increase of 4-NP concentration in tap water.

## Reference

- 1 G. M. Sheldrick, SHELXTL, Reference Manual: version 5.1: Bruker AXS; Madison, WI, 2014.
- 2 A. L. Spek, J. Appl. Crystallogr., 2003, **36**, 7.
- 3 DIAMOND. version 3.1; Crystal Impact: Bonn, Germany, 2004.
